# Supplementary material for: Gurney and cylinder wall velocities of explosives: analytical estimates and thermochemical simulations
Source: Royal Society of Chemistry journal article supplement (doi:10.1039/d5cp00761e), 2025-01-01
Supplement: d5cp00761e3.xlsx [file d5cp00761e3.xlsx]

## Sheet: Table S4
Table S4. Gurney velocities (km.s-1): Experimental data compared to theoretical values derived using the EXPLO5 and Cg procedures.
Explosive	DfH0 (kJ/mol)	r0 (g.cm-3)	Expe. (Ref. 12)	EXPLO5 (Ref. 12)	Cg (This work)	Original Ref.
High explosives deprived of Al
RDX	79.1	1.77	2.93	2.93	2.9628	[10]
DATB	-98.7	1.79	2.56	2.44	2.4515	[10]
HMX	75.3	1.84	2.8	2.96	2.96528	[10]
HMX	75.3	1.89	2.97	2.98	2.97564	[10]
HMX	75.3	1.2	2.74	2.56	2.76619	[10]
NM	-113	1.14	2.41	2.43	2.40715	[10]
TACOT	462.3	1.61	2.12	2.34	2.28472	[10]
TETRYL	19.7	1.62	2.5	2.59	2.56378	[10]
TNT	-63.2	1.63	2.37	2.38	2.33134	[10]
TNT	-63.2	1.63	2.44	2.38	2.33134	[10]
TNT	-63.2	1.63	2.46	2.38	2.33134	[10]
HNS	78.2	1.2	2.18	2.16	1.9915	[33]
HNS	78.2	1.6	2.53	2.39	2.28913	[33]
PETN	-538.5	1.5	2.9	2.71	2.81348	[29]
PETN	-538.5	1.27	2.69	2.55	2.7152	[29]
PETN	-538.5	1.76	2.93	2.87	2.89567	[10]
EDD	-652.7	1.55	2.56	2.4	2.39136	[21]
COMP-A3	11.7	1.59	2.63	2.71	2.759	[10]
COMP-B	5.4	1.71	2.7	2.7	2.74159	[10]
COMP-B	5.4	1.72	2.79	2.7	2.74452	[10]
COMP-B	5.4	1.72	2.71	2.7	2.74452	[10]
COMP-B	5.4	1.65	2.68	2.67	2.7233	[29]
COMP-B	5.4	1.72	2.71	2.71	2.74452	[10]
COMP-B	5.4	1.73	2.83	2.71	2.74742	[29]
COMP-C-3	15.5	1.6	2.68	2.68	2.70481	[10]
C-4	13.8	1.6	2.66	2.71	2.75133	[10]
RDX/TNT 75/25	13.4	1.75	2.86	2.81	2.81484	[29]
CYCLOTOL-77=23	15.1	1.75	2.79	2.83	2.81663	[10]
OCTOL-75=25	11.7	1.81	2.8	2.83	2.83937	[10]
OCTOL-78=22	12.6	1.82	2.83	2.85	2.84871	[10]
Pentolite50=50	-100	1.67	2.56	2.63	2.61795	[10]
RDX/Wax 96/4	26.4	1.65	2.73	2.81	2.86588	[33]
PBX-9011	-16.9	1.77	2.82	2.77	2.79073	[10]
PBX-9404	0.4	1.84	2.9	2.89	2.90981	[10]
PBX-9501	9.5	1.84	2.89	2.91	2.91492	[10]
PBX-9502	-87	1.89	2.38	2.39	2.32814	[10]
LX-04	-90	1.87	2.78	2.79	2.79092	[10]
LX-09	7.6	1.84	2.89	2.94	2.92885	[10]
LX-10	-13.1	1.86	2.92	2.91	2.90109	[10]
LX-11	-128.6	1.88	2.8	2.74	2.73197	[29]
LX-14	6.3	1.83	2.8	2.89	2.88798	[10]
LX-14	6.3	1.89	2.97	2.92	2.90076	[10]
Baratol	-295.4	2.55	1.62	1.76	1.49621	[29]
Al-containing explosives
HBX-1	-11	1.7	2.47	2.56	2.5452	[10]
Torpex-2	3.8	1.71	2.68	2.6	2.48367	[10]
H-6	-7.3	1.76	2.58	2.5	2.66082	[10]
Tritonal	-22.2	1.72	2.32	2.28	1.11549	[10]
HTA-3	10.5	1.71	2.59	2.54	2.47896	[10]
HBX-3	-43.1	1.81	1.98	2.02	2.21019	[10]
PAX-29	43.1	2	3.16	3.03	3.00718	[33]
PAX-30	-8.2	1.91	3.07	2.97	3.02324	[33]
Minol II	-194.3	1.68	2.53	2.59	2.65163	[33]
Ammonium nitrate-based explosives
RDX/AN-40/60	-262.8	1.72	2.54	2.65	2.56322	[29]
RDX/AN-40/60	-262.8	1.72	2.54	2.66	2.56322	[29]
TNT/RDX/AN-40/20/40	-188.2	1.61	2.5	2.58	2.58539	[29]
ANFO	-441.8	0.78	2.02	2	1.56613	[29]
ANFO	-441.8	0.82	2.14	2.02	1.61684	[29]
ANFO	-441.8	0.9	1.89	1.97	1.70322	[34]
ANFO	-441.8	0.94	1.87	1.91	1.74043	[31]
ANFO	-441.8	0.78	1.78	1.89	1.56613	[34]
ANFO	-441.8	0.85	1.7	1.72	1.65134	[34]
ANFO	-441.8	0.83	1.63	1.58	1.62865	[34]
ANFO	-441.8	0.83	1.7	1.79	1.62865	[34]
Additional miscellaneous explosives (suggested by a reviewer)
DNAN	-186.65	1.45	2		1.969	[39]
SK TNBI	-414	1.55	2.14		2.187	[40]
TNBI 2H2O	-115	1.72	2.62		2.661	[40]
NTO	-100.71	1.77	2.37		2.31	[41]
RX-45-AA	15.77	1.752	2.31		2.216	[42]
AmPicCC	-147.7	1.481	2.13		2.091	[43]
DINGU/HNE/wax (63/32/5)	-46.99	1.63	2.32		2.612	[44]
NTO/HNE/wax (76/19/5)	-52	1.7515	2.49		2.503	[44]
NITRA	93.89	1.56	2.28		2.312	[44]

## Sheet: Table S5
Table S5. Explosives considered in refs.11-12 along with corresponding stoichiometries, theoretical maximal densities (TMD) anf formation enthalpies. Densities anf formation enthalpies not available from ref.7 were retrieved from alternatives sources: Cambridge Structural Database for densities, NIST Chemistry Webbook for formation enthalpies.
Explosive	Formula	TMD (g.cm-3)	DfH0 (kJ/mol)
COMP-A3	C1.87 H3.74 N2.46 O2.46	1.672	11.7
COMP-B	C2.03 H2.64 N2.18 O2.67	1.75	5.4
COMP-C-3	C1.90 H2.83 N2.34 O2.60	1.62	15.5
CYCLOTOL-77=23	C1.75 H2.59 N2.38 O2.69	1.74	15.1
CYCLOTOL-75=25	C1.78 H2.58 N2.36 O2.69	1.77	13.4
DATB	C6H5N5O6	1.837	-98.7
Explosive-D	C6H6N4O7	1.717	-393.3
HMX	C4H8N8O8	1.9	74.9
LX-14	C1.52 H2.92 N2.59 O2.66	1.837	6.3
NM	CH3NO2	1.1371	-113
NQ	C1H4N4O2	1.81	-92.5
OCTOL-78=22	C1.74 H2.59 N2.40 O2.69	1.821	12.6
OCTOL-75=25	C1.78 H2.58 N2.36 O2.69	1.821	11.7
PBX-9404	C1.40 H2.75 N2.57 O2.69	1.865	0.4
PBX-9502	C2.30 H2.23 N2.21 O2.21	1.942	-87
Pentolite50=50	C2.33 H2.37 N1.29 O3.22	1.68	-100
PETN	C5H8N4O12	1.78	-538.5
RDX	C3H6N6O6	1.81	61.5
TACOT	C12H4N8O8	1.85	462.3
TETRYL	C7H5N5O8	1.73	19.7
TNT	C7H5N3O6	1.654	-62.8
DADNE	C2H4N4O4	1.78	-133.9
M3	C0.85 H7.24 N1.32 O4.00	1.14	-640.2
M4	C1.26 H7.91 N0.92 O4.00	1.14	-655.6
ANFO	C0.43 H5.50 N2.35 O3.52	0.75	-441.8
RDX=(CH2)n	C1.70 H3.39 N2.54 O2.54	1.65	13
AN	N2 H4 O3	1.725	-365.2
RDX/AN-40/60	C0.54 H4.08 N2.58 O3.33	1.746	-262.8
TNT/RDX/AN-40/20/40	C1.77 H2.96 N2.11 O2.89	1.714	-91.2
SodiumNitrate	NaNO3	2.257	-466.9
E-682	C0.393 H5.726 N1.77 O3.77 Na0.13 Si0.05	1.5258	-651
E-682 (6 % Al)	C0.357 H5.355 N1.662 O3.55 Al0.222 Na0.121 Si0.052	1.57	-615.9
HTA-3	C1.556 H1.962 N1.707 O2.09 Al0.815	1.9454	2.9
PAX-29	C1.313H1.474N2.169O2.336Al0.556	2.01	43.1
PAX-42	C1.299H2.501N2.141O2.308Al0.556	1.834	-6.4
AFX-902	CH4N4O2	1.76	-86.6
SEMTEX H	C1.466 H2.616 N1.983 O3.249	1.53	-174.9
TNT	C7H5N3O6	1.654	-74.9
RDX	C3H6N6O6	1.81	61.9
HMX	C4H8N8O8	1.9	74.9
ANPZO	C4H4N6O5	1.88	13
AZTO	C4H4N8O3	1.786	10.9
BPTAP	C11H3N9O8	1.858	443.9
DAAF	C4H4N8O3	1.786	443.9
DADNE	C2H4N4O4	1.885	-133.9
DNAN	C7H6N2O5	1.586	-187
GUDN	C2H7N7O5	1.76	-354.8
NQ	C1H4N4O2	1.77	-92
NTO	C2H2N4O3	1.9	-97.1
TATB	C6H6N6O6	1.93	-154
TEX	C6H6N4O8	1.985	-541
LX-04	C1.55 H2.58 N2.30 O2.30 F0.52	1.889	-90
LX-09	C1.43 H2.74 N2.59 O2.72 F0.02	1.867	7.6
LX-10	C1.415 H2.66 N2.575 O2.575 F0.165	1.87	-13.1
PBX-9011	C1.73 H3.18 N2.45 O2.61	1.795	-16.9
PBX-9501	C1.47 H2.86 N2.60 O2.69	1.855	9.5
RDX/AN-40/60	C0.54 H4.08 N2.58 O3.33		-262.8
TNT/RDX/AN-40/20/40	C1.5 H3.42 N2.07 O3.1		-188.2
C-4	C1.82H3.54N2.46O2.51		13.8
Baratol	C0.74 H0.53 N0.90 O2.38 Ba0.29	2.63	-295.4
EDD	C2 H10 N4 O6		-652.7
H-6	C1.89 H2.59 N1.61 O2.01 Al0.74	1.791	-7.3
HBX-1	C2.06 H2.62 N1.57 O2.07 Al0.63	1.76	-11
HBX-3	C1.67 H2.18 N1.23 O1.61 Al1.29	1.887	-43.1
HBX-3-OK	C1.66 H2.18 N1.21 O1.60 Al1.27 Cl0.009	1.882	-10.9
HNS	C14 H6 N6 O12	1.745	78.2
HTA-3	C1.556 H1.962 N1.707 O2.09 Al0.815	1.949	10.5
Minol II	C1.23 H2.88 N1.53 O2.56 Al0.74	1.826	-194.3
PAX-29	C1.313 H1.474 N2.169 O2.336 Al0.556	2.01	43.1
PAX-30	C1.299 H2.501 N2.141 O2.308 Al0.556	1.909	-8.2
PAX-3Ame	C1.24 H2.38 N1.929 O2.23 Al0.741	2.0352	-6.7
PAX-3A	C1.299 H2.501 N2.141 O2.308 Al0.556
PAX-42	C1.299 H2.501 N2.141 O2.308 Al0.556
RDX/TNT 75/25	C1.78 H2.58 N2.36 O2.69	1.77	13.4
RDX/Wax 96/4	C1.582 H3.164 N2.593 O2.593	1.7685	26.4
RDX	C3H6N6O6	1.858	79.1
Torpex-2	C1.8 H2.015 N1.663 O2.191 Al0.667	1.8716	3.8
Tritonal_orig	C2.466 H1.761 N1.057 O2.113 Al0.741	1.7938	-22.2
Tritonal	C2.466 H1.761 N1.057 O2.113 Al0.741	1.7938	-22.2
Tritonal60TNT40Al	C1.849 H1.321 N0.792 O1.585 Al1.482	1.9571	-82.4
Tritonal40TNT60Al	C1.233 H0.881 N0.528 O1.057 Al2.224	2.1545	-54.8
Tritonal80TNT20Al	C2.466 H1.761 N1.057 O2.113 Al0.741	1.7928	-109.6
Tritonal20TNT80Al	C0.616 H0.440 N0.264 O0.528 Al2.965	2.3962	-27.6
LX-11	C1.61 H2.53 N2.16 O2.16 F0.70	1.875	-128.6
BDNAF	C15H26N8O20	1.94	-915.9
HMX	C4H8N8O8	1.91	75.3
Aluminium	Al	2.71	0
wax	CH2	0.82	-27.6
TNT	C7H5N3O6	1.654	-63.2
PVDF	C2H2F2	1.78	-430.1
polyHFP	C3F6	2	-1249.8
Viton A	C2.674 H1.874 F3.474	1.86	-733.9
FEFO	C5H6N4O10F2	1.607	-742.7
AN	H4N2O3	1.725	-365.1

## Sheet: Table S6
Table S2. Cylinder wall velocities (km.s-1): Experimental data compared to theoretical values derived using the EXPLO5 and Cg procedures.
		Expansion ratio = 2.2				Expansion ratio = 3.9				Expansion ratio = 6.2
Explosive	loading density	Expe. (Ref. 12)	EXPLO5 (Ref. 12)	Gurney/Cg	Eq. 8	Expe. (Ref. 12)	EXPLO5 (Ref. 12)	Gurney/Cg	Eq. 8	Expe. (Ref. 12)	EXPLO5 (Ref. 12)	Gurney/Cg	Eq. 8
BTF_1.85	1.85	1.605	1.705	1.51908	1.53528	1.755	1.858	1.68074	1.67794	1.835	1.909	1.761	1.74877
HMX_1.19	1.19	1.173	1.204	1.25245	1.1291	1.314	1.362	1.377	1.25321	1.384	1.426	1.43719	1.31375
HMX_1.89	1.89	1.65	1.754	1.64019	1.65041	1.82	1.904	1.78582	1.79832	1.883	1.946	1.85327	1.87208
HNB_1.97	1.97	1.7	1.791	1.64445	1.6854	1.88	1.991	1.80793	1.83491	1.955	2.062	1.88693	1.90955
HNS_1.0	1	0.817	0.894	0.818519	0.78424	0.931	1.017	0.919211	0.892599	0.981	1.069	0.97285	0.944402
HNS_1.2	1.2	0.959	1.029	0.963714	0.929246	1.073	1.159	1.07853	1.04423	1.145	1.211	1.13853	1.0997
HNS_1.402	1.402	1.081	1.163	1.09187	1.07302	1.207	1.298	1.21801	1.19457	1.266	1.349	1.28292	1.25369
HNS_1.504	1.504	1.17	1.232	1.15114	1.14523	1.297	1.369	1.2822	1.27008	1.368	1.42	1.34917	1.33103
HNS_1.597	1.597	1.229	1.298	1.2025	1.21098	1.34	1.436	1.33766	1.33883	1.413	1.487	1.40634	1.40145
HNS_1.61	1.61	1.21	1.309	1.20949	1.22017	1.335	1.447	1.3452	1.34844	1.393	1.5	1.4141	1.41129
HNS_1.655	1.655	1.228	1.334	1.23335	1.25197	1.362	1.473	1.37091	1.38169	1.433	1.525	1.44058	1.44534
HNS_1.681	1.681	1.255	1.352	1.24691	1.27034	1.385	1.489	1.38551	1.4009	1.458	1.544	1.45559	1.46502
NM_1.13	1.13	1.045	1.12	1.07717	1.00112	1.18	1.264	1.19455	1.11939	1.23	1.321	1.2534	1.17668
PETN_1.261	1.261	1.156	1.233	1.26391	1.15858	1.304	1.405	1.39391	1.28404	1.382	1.476	1.45758	1.34533
PETN_1.507	1.507	1.355	1.417	1.41284	1.3427	1.51	1.592	1.55216	1.47657	1.59	1.659	1.61927	1.54252
PETN_1.765	1.765	1.56	1.626	1.55106	1.53662	1.705	1.799	1.69827	1.67934	1.79	1.858	1.76816	1.7502
TNAZ_1.83	1.83	1.64	1.737	1.6262	1.61768		1.906	1.77909	1.7641	1.87	1.96	1.85142	1.83702
TNGU_1.885	1.885	1.6	1.665	1.51927	1.55759	1.75	1.835	1.66406	1.70127	1.825	1.89	1.73291	1.77267
TNM_1.65	1.65	1	1.051	0.87281	1.01227	1.095	1.143	0.959931	1.13104	1.13	1.18	1.0021	1.18862
TNT_1.632	1.632	1.21	1.308	1.21992	1.24122	1.355	1.442	1.35312	1.37044	1.41	1.496	1.41996	1.43383
TATB_1.8	1.8	1.281	1.372	1.28622	1.35238	1.392	1.5	1.41248	1.48669	1.448	1.544	1.4732	1.55289
TATB_1.83	1.83	1.3	1.391	1.30267	1.37435	1.403	1.519	1.42953	1.50966	1.453	1.562	1.49035	1.57642
TATB_1.85	1.85	1.312	1.406	1.31348	1.38897	1.417	1.534	1.44073	1.52495	1.47	1.577	1.50161	1.59207
1,2-DP_1.256	1.256	1.09	1.184	1.28143	1.16953	1.235	1.355	1.40805	1.29549	1.31	1.432	1.46909	1.35705
FEFO_1.607	1.607	1.34	1.438	1.37405	1.35103	1.49	1.6	1.5116	1.48527	1.56	1.658	1.57824	1.55144
PF_1.833	1.833	1.395	1.447	1.32612	1.38765	1.525	1.581	1.46498	1.52357	1.585	1.626	1.53347	1.59066
C-4_1.6	1.6	1.378	1.475	1.41471	1.37802	1.522	1.623	1.55158	1.5135	1.582	1.672	1.61703	1.58035
LX-14_1.83	1.83	1.59	1.672	1.57021	1.57492	1.73	1.818	1.7126	1.71938	1.79	1.861	1.77906	1.79122
AFX-902_1.74	1.74	1.297	1.332	1.26213	1.31433	1.384	1.445	1.37156	1.4469	1.417	1.48	1.4218	1.51214
SEMTEX H_1.53	1.53	1.263	1.374	1.27524	1.25735	1.383	1.52	1.4031	1.38732	1.438	1.574	1.46509	1.45111
PBX-9404_1.84	1.84	1.603	1.68	1.58589	1.59031	1.747	1.83	1.72876	1.73549	1.812	1.874	1.79528	1.80771
